# Supplementary material for: A novel SiO monolayer with a negative Poisson's ratio and Dirac semimetal properties
Source: Royal Society of Chemistry journal article supplement (doi:10.1039/d0cp02169e), 2020-01-01
Supplement: d0cp02169e1.pdf [file d0cp02169e1.pdf]

## Supporting Information

# **A Novel SiO Monolayer with Negative Poisson's Ratio and Dirac Semimetal**

Hui Du<sup>1</sup>, Guoling Li<sup>2</sup>, Jiao Chen<sup>3</sup>, Zhenlong Lv<sup>1</sup>, Yuanzheng Chen<sup>3\*</sup>, Shijie Liu<sup>1, 4\*</sup>

<sup>1</sup> Henan Key Laboratory of Photoelectric Energy Storage Materials and Applications, School of Physics and Engineering, Henan University of Science and Technology, Luoyang, 471023, China

<sup>2</sup> Chemistry and Chemical Engineering Guangdong Laboratory, Shantou 515031, China

<sup>3</sup> School of Physical Science and Technology, Key Laboratory of Advanced Technologies of Materials, Ministry of Education of China, Southwest Jiaotong University, Chengdu 610031, China

<sup>4</sup> State Key Laboratory of Superhard Materials, Jilin University, Changchun 130012, China.

\* Corresponding authors

E-mail: liusj0228@163.com, cyz@calypso.org.cn

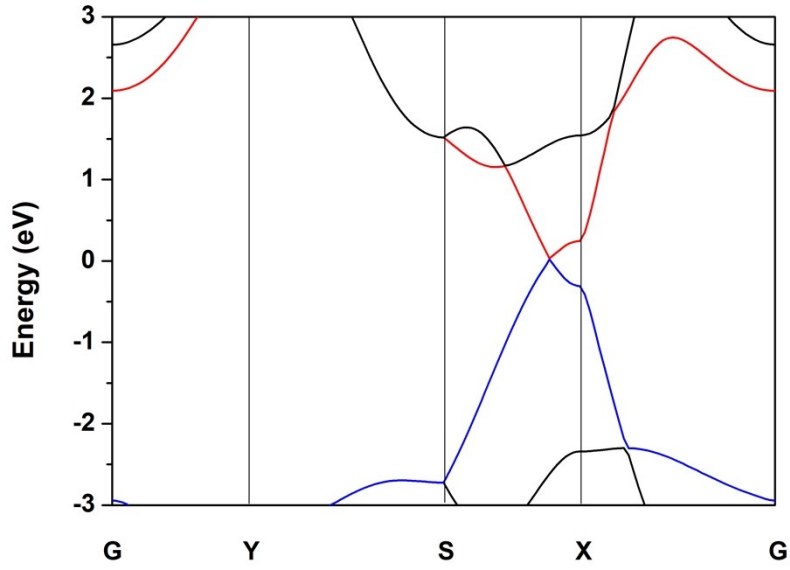

Figure S1. The band structure of Pmna by HSE method.

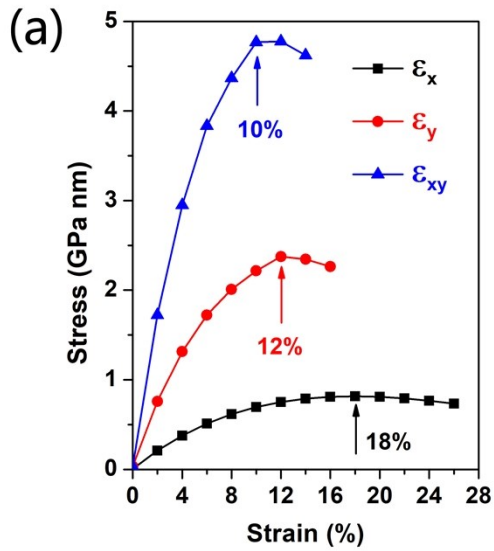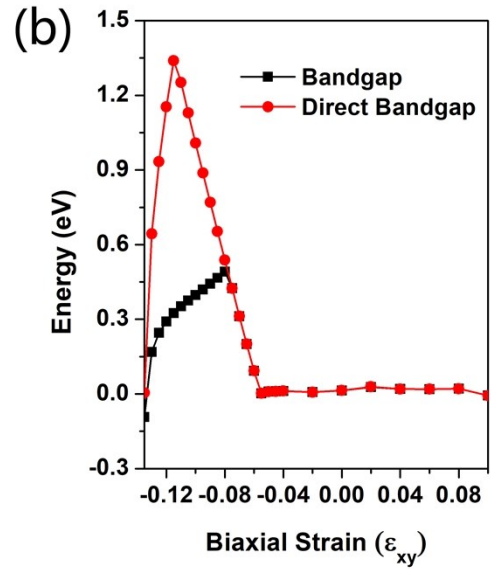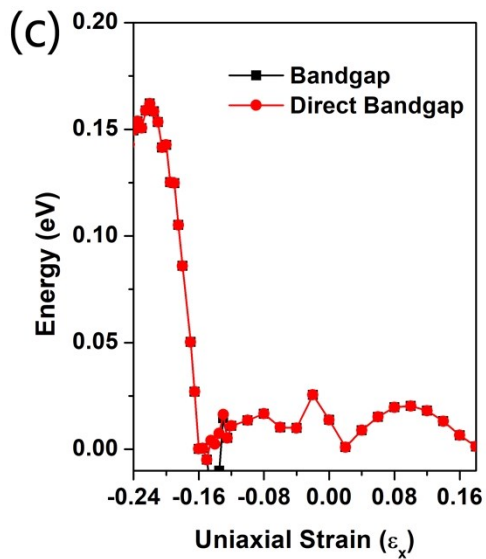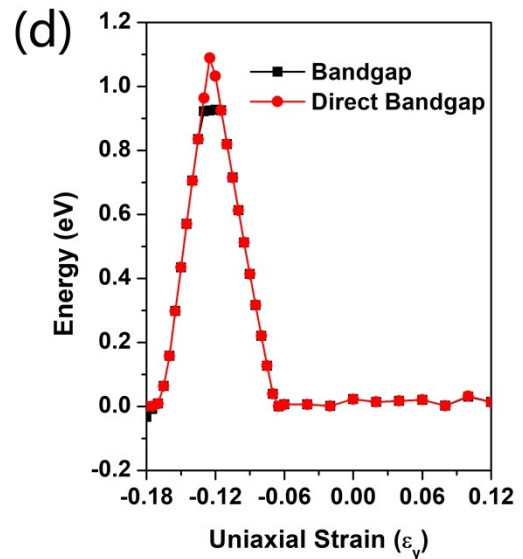

Figure S2. The calculated stress (a) versus the applied strain and bandgap along xy (b), x (c) and y (d) of Pmna structure.

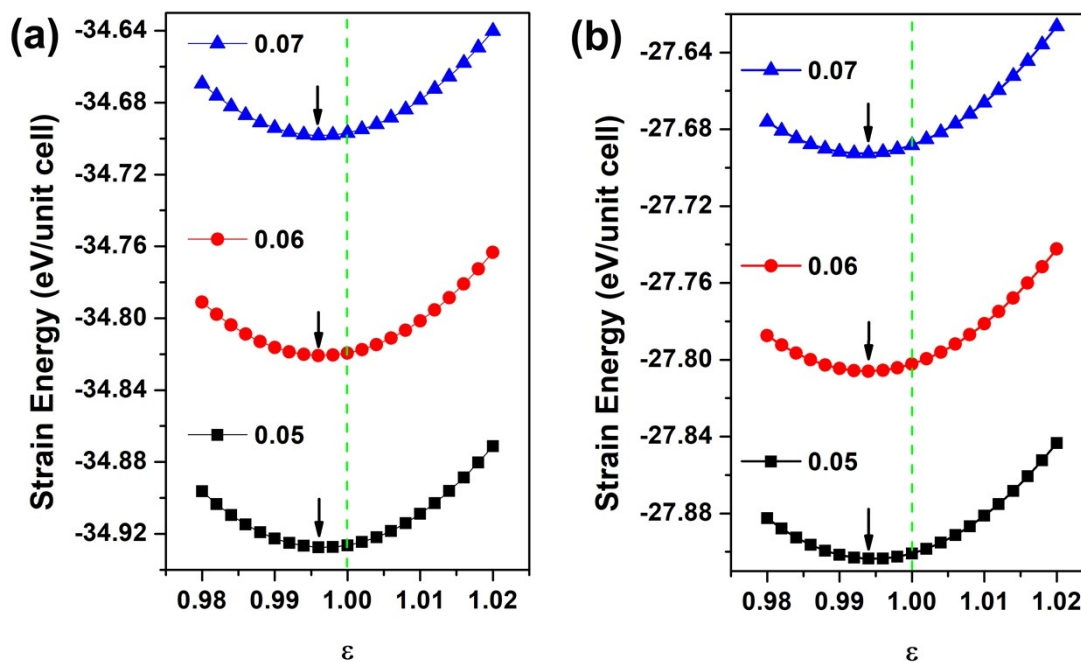

Figure S3. Total energy with respecting to lattice response of the other direction when the BN AB stack (a) and SiC AB stack (b) lattice is under 5%, 6% and 7% tensile strain along y directions, respectively. The arrows indicate the equilibrium magnitude of  $\epsilon$ .

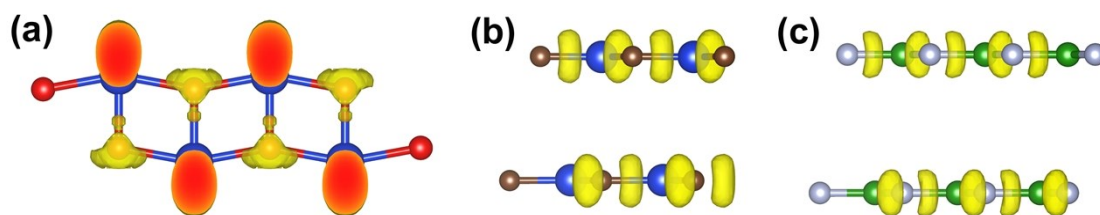

Figure S4. The calculated ELF of 2D SiO (a) and SiC AB stack (b) and BN AB stack (c), respectively.
